# Supplementary material
Source: PubMed Central journal article supplement (PMC3656449)
Supplement: supp_blood-2012-10-461566_blood-2012-10-461566-1.pdf [file supp_blood-2012-10-461566_blood-2012-10-461566-1.pdf]

## SUPPLEMENTAL METHODS

**Cell differentiation, Viruses and Infections:** The human myelomonocytic cell line KG-1<sup>14</sup> was differentiated into iDC as indicated in Supplemental Table 1. The monocytic cell line THP-1 was differentiated into macrophages with PMA (200 nM).<sup>15</sup> Human PBMCs were obtained from the Boston Children's Hospital blood bank. CD14<sup>+</sup> monocytes were differentiated into iDC with GM-CSF (100 ng/ml) and IL-4 (50 ng/ml) or into MDM with M-CSF (100 ng/ml). Experiments were carried out with either the dual tropic HIV<sub>SF2</sub> or the CCR5 tropic HIV<sub>Bal</sub>. iDC and macrophages were infected with HIV<sub>SF2</sub>-Flag Tat (20 ng of p24 per 1x10<sup>6</sup> cells) for 6 hours and then resuspended with fresh medium and maintained in culture for 7-10 days. For the inhibition experiments, macrophages were infected as above with HIV<sub>Bal</sub> and after 6 hours resuspended with fresh medium in the presence or absence of inhibitors of p38 (SB203580 and PH797804) and JNK (AS601245). Seven days post infection, cells were collected for RNA isolation and the supernatants were used for functional assay. HIV infectivity on day 10 ranged between 40 and 50%, when cells were stained with an anti-Flag antibody.

**Chromatin immunoprecipitation (ChIP) and DNA microarray analysis (ChIP-Chip):** For ChIP cells were infected with adenoviruses, subsequently cells were lysed and cell lysates were cross-linked and sonicated to yield an average DNA fragment of 500 bps. The sheared chromatin was incubated with protein G magnetic beads (Invitrogen) coupled to anti-FLAG (Sigma M2) monoclonal antibodies (Santa Cruz Biotechnology). This antibody was used because of its lack of background in ChIP experiments.<sup>8,18</sup> Amplified DNA was labeled and purified using Bioprime random primer labeling kits (Invitrogen), immunoenriched DNA was labeled with Cy5 fluorophore, whole cell extract DNA was labeled with Cy3 fluorophore. Labeled DNA was mixed and hybridized to Agilent Human Promoter ChIP-on-chip Microarray Set for 20 hours at 40°C. The microarrays (Design ID - 014706 and 014707) have probes for about 17,000 human promoters. Arrays were then washed using standard Agilent protocols and scanned using an Agilent DNA microarray scanner BA. Scans were manually examined for abnormal features and intensities were extracted for each spot automatically using Agilent feature extraction software. We calculated the log of the ratio of median normalized intensity in the IP-enriched channel to median

normalized intensity in the genomic DNA channel for each probe and used a whole chip error model [64] to calculate confidence values for each spot on each array (single probe p-value). This error model functions by converting the intensity information in both channels to an X score which is dependent on both the absolute value of intensities and background noise in each channel. The X scores for an array are assumed to be normally distributed which allows for calculation of a p-value for the enrichment ratio seen at each feature. To determine bound regions in the datasets, we calculated the average X score of the 60-mer and its two immediate neighbors. If a feature was flagged as abnormal during scanning, we assumed it gave a neutral contribution to the average X score. Similarly, if an adjacent feature was beyond a reasonable distance from the probe (based on the maximum size of labeled DNA fragments hybridized to the array), we assumed it gave a neutral contribution to the average X score. This set of averaged values gave us a new distribution that was subsequently used to calculate p-values of average X (probe set p-values). If the probe set p-value was less than 0.001, the three probes were marked as potentially bound. In addition, the three probes in a probe set must each have single probe p-values  $< 0.05$  or the center probe in the probe set has a single probe p-value  $< 0.01$  and one of the flanking probes has a single point p-value  $< 0.1$ . Association with promoters was identified if the bound regions were 8kb upstream or 2 kb downstream of the Transcription Start Site<sup>20</sup>. Control experiments in cells expressing the negative control Tat<sub>SF2</sub>G48-R57A showed only 34 positive signals, which is an acceptable background for ChIP-Chip experiments, supporting the specificity of the results observed with Ad-Tat<sub>SF2</sub>. For conventional ChIP analysis the purified DNA was quantified by qPCR. The primers used in qPCR are described in Supplemental Table 2. Primers were designed near the site represented by the oligonucleotides present in the promoter arrays that provided a positive signal and were used for qPCR amplification of the corresponding sequences present in the immunoprecipitation-captured chromatin. 10 ng of immunoprecipitated DNA material and 10-90 ng of input (total) DNA samples were used in qPCR reactions. PCR products obtained by standard PCR for qualitative analysis were visualized on agarose gel with ethidium bromide.

**Ingenuity Pathway analysis:** The analysis for the identification of significant biological pathways and networks with whom CHIP-on-Chip derived genes are associated was carried out using Ingenuity Pathways Analysis software v7.6 (Ingenuity Systems, [www.ingenuity.com](http://www.ingenuity.com)). The canonical pathway analysis selects genes that have been previously identified as part of specific pathways and have been included in the Ingenuity's Pathways Analysis library of canonical pathways. The p-value was calculated using the right-tailed Fisher Exact Test to determine the probability that the association between the genes in a dataset and the canonical pathway is explained by chance alone. With this method, the p-value for a given process annotation is calculated by considering (1) the number of focus genes that participate in that process and (2) the total number of genes that are known to be associated with that process in the selected reference set. Networks of genes were algorithmically generated based on their connectivity by overlaying the target genes onto a global molecular network developed from information contained in the Ingenuity Pathways Knowledge Base.

**Kinase inhibitors and their specificity:** AS601245 is a potent JNK1/2 and JNK3 inhibitor and exhibits specific selectivity for JNK as compared to ERK1 and p38 (*Ferrandi C et al. (2004) Br J Pharmacol. 142(6): 953–960*).

SB203580 is a highly specific, ATP competitive inhibitor of p38 MAP kinase (IC<sub>50</sub> = 34 nM *in vitro*, 600 nM in cells). It does not significantly inhibit the JNK and p42 MAP kinase (ERK) at 100 μM (*Rouse, J. et al. (1994) Cell 78, 1027-1037; Han, J. et al. (1994) Science 265, 808-811*). In our study we used it at 10 μM.

PD98059 (MEK1 Inhibitor) inhibits activation of MEK1 and MEK2 with IC<sub>50</sub> values of 4 μM and 50 μM, respectively. It has been shown that PD98059 does not inhibit activation of other highly related dual-specificity protein kinases or the activity of over 18 other Ser/Thr protein kinases (*Rosen, L.B. et al. (1994) Neuron 12, 1207–1221*). At concentrations up to 100 μM, PD98059 does not inhibit activation of MKK3/6 or MKK4 as determined by measuring phosphorylation at its activation site.

Supplementary Table S1. Phenotypic marker expression on the KG-1 cells

| Cell marker | Percentage of positive cells |            |                |         |           |
|-------------|------------------------------|------------|----------------|---------|-----------|
|             | untreated                    | GM-CSF/IL4 | GM-CSF/IL4/TNF | PMA/TNF | human iDC |
| CD80        | 2                            | 1.7        | 2              | 6.8     | 2.9       |
| CD86        | 2                            | 16         | 17.2           | 9.5     | 50        |
| CD83        | 4                            | 8.4        | 13             | 20.3    | 22        |
| HLA-DR      | 23                           | 29         | 31             | 36      | 50        |
| CD14        | -                            | -          | -              | -       | -         |
| CD1a        | 2.5                          | 2          | 2.3            | 3.6     | 45        |
| CD11c       | 19.5                         | 34         | 61.2           | 39      | 82        |

KG-1 cells were cultured in medium alone, GM-CSF (100 ng/ml) and IL4 (50 ng/ml) with or without TNF- $\alpha$  (2.5 ng/ml), or PMA (10 ng/ml) plus TNF- $\alpha$  (10 ng/ml). The time of maximal expression varied depending on the stimulus. The data reported were observed after 5 days in culture.

Supplemental Table S2: Oligonucleotide sequences used in RT-qPCR.

| Gene   | RefSeq no. | Primers                          | 5' Oligo                                      | 3' Oligo                                      | Size       |
|--------|------------|----------------------------------|-----------------------------------------------|-----------------------------------------------|------------|
| IRF7   | NM_001572  | E1(+196/+325)<br>E2(+1742/+1841) | CTGGACACTGGTTCAACACCT<br>CCCCATCTTCGACTTCAGAG | GTGTGGACTGAGGGCTTGTAG<br>CGAAGCCCAGGTAGATGGTA | 130<br>100 |
| IP10   | NM_001565  | E1(+238/+382)                    | CCACGTGTTGAGATCATTGC                          | ATTTTGCTCCCCTCTGGTTT                          | 145        |
| MAP2K3 | NM_002756  | E1(+39/+185)<br>E2(+458/+587)    | CCAGTCCAAAGGAAAATCCA<br>CGGAAGGTGCTGGATAAAAA  | TCAGCCTCCACCTCAAAGTT<br>ACATTGGAGGGCTTCACATC  | 147<br>134 |
| MAP2K4 | NM_003010  | E1(+270/+388)<br>E2(+1051/+1188) | CCCTGAACAACACTGGGATT<br>GATGAATCCAAAAGGCCAAA  | CTGCCATTATTTGCCCACTT<br>CATGGGAGAGCTGGGAGTAG  | 119<br>138 |
| MAP2K6 | NM_002758  | E1(+252/+360)<br>E2(+560/+694)   | CCGAGCCACAGTAAATAGCC<br>TCAATGCTCTCGGTCAAGTG  | AAACAGTGCGCCATAAAAGG<br>TCTGGTTGAGCTCTGGGTTT  | 109<br>135 |
| MCP2   | NM_005623  | E1(+424/+559)                    | ACCTTCACCTCTCATGCTGAA                         | TGGAATGGAACTGAATCTGG                          | 136        |
| MIG    | NM_002416  | E1(+2066/+2178)                  | GAAGCAGCCAAGTCGGTTAG                          | AATTCTGGCCACAGACAACC                          | 123        |
| STAT1  | NM_007315  | E1(+823/+923)<br>E2(+1287/+1373) | TGAAATCAAGAGCCTGGAAGA<br>TTCAGAGCTCGTTTGTGGTG | GATCACTCTTTGCCACACCAT<br>TGAAGTGGACCCCTGTCTTC | 101<br>87  |
| TRAIL  | NM_003810  | E1(+480/+620)<br>E2(+1450/+1569) | ACCAGAGGAAGAAGCAACACA<br>GGAACCCAAGGTGGGTAGAT | GACCAGTTCACCATTCTCAA<br>CTACAGGCATGTGCCAACAC  | 141<br>120 |

Oligonucleotide sequences used for ChIP-qPCR

| Gene   | Ref Seq no. | Primers                                         | 5' Oligo                                                              | 3' Oligo                                                             |
|--------|-------------|-------------------------------------------------|-----------------------------------------------------------------------|----------------------------------------------------------------------|
| MAP2K3 | NM_002756   | P1(-474/-353)<br>P2(-237/-108)<br>P3(+12/+102)  | TAGGGAGCTTGCTAGGGTGA<br>CTGGCGGACTTGACAGAGA<br>GCCTGAGTCAGCGCAGTT     | ACCCGAGATCCCTAAAGGTG<br>TTGGTCCTTTTCGTTTCCAAG<br>GACTGCAGCAAGGACGAGT |
| MAP2K4 | NM_003010   | P1(-629/-780)<br>P2(-388/-194)<br>P3(+109/+174) | AGCAGCAGGAGGAGAAAGAA<br>CTGTGCAAAGCAATGGAAGA<br>GAGAGGCCGAGCTTGCTG    | TACCTGCACGTCTTCATTGC<br>TCCCAGCCTCCTGAAATATG<br>GCCATTGTTGGGAGTGAAGA |
| MAP2K6 | NM_002758   | P1(-1028/-894)<br>P2(-398/-228)<br>P3(-162/-17) | CGACCACGTTTCCTTAAATCA<br>GCCAACCCAATCATCCATAC<br>GGACGTCTGCGCACTAAGAT | GGCAGCTAAAAGCTCCAACT<br>ACGGGGTGTCAACATTTAGC<br>AATGCACACCTTGCAAAACA |
| IRF7   | NM_001572   | P1(-443/-346)<br>P2(-271/-139)<br>P3(+74/+181)  | ACACCAGCCTGACCAACATAG<br>CCTGGGTAACAAAAGCGAAA<br>GCTCTGGCACCCAGGTAAT  | CTCCCGAGTAGCTGGGATTAC<br>AGGGGACAGAGCAAGACTCA<br>CCCAGCTCTTGGCTCTAC  |

Supplemental Table S3: Comparative analysis of Tat association with promoters in APC

| Promoter analysis associated with HIV Tat in KG-iDC |          |                                        | Promoter analysis associated with HIV Tat in THP-Mac                           |          |                             |
|-----------------------------------------------------|----------|----------------------------------------|--------------------------------------------------------------------------------|----------|-----------------------------|
| Ingenuity Canonical Pathways                        | p-value  | Molecules                              | Ingenuity Canonical Pathways                                                   | p-value  | Molecules                   |
| IL-1 Signaling                                      | 1.86E-04 | MAP2K4,PRKACB,MAP2K6, IL1A             | p38 MAPK Signaling                                                             | 1.78E-02 | MAP2K4,MAP2K6,IL1A,TGFB3    |
| p38 MAPK Signaling                                  | 3.62E-03 | MAP2K4,MAP2K6,IL1A,TGFB3               | IL-10 Signaling                                                                | 6.22E-02 | MAP2K6,IL1RAPL1             |
| cAMP-mediated signaling                             | 4.80E-03 | PRKACB,PKIA,AKAP7,RAP1A                | IL-1 Signaling                                                                 | 1.67E-02 | MAP2K6,H3f3a/H3f3b,IL1RAPL1 |
| Dendritic Cell Maturation                           | 8.40E-03 | MAP2K4,IL1A,PIK3R1                     | Nicotinate and Nicotinamide Metabolism                                         | 1.10E-01 | MAP2K6,CDK8                 |
| Toll-like Receptor Signaling                        | 1.01E-02 | MAP2K4,MAP2K6                          | Estrogen Receptor Signaling                                                    | 1.31E-01 | CDK8,H3f3a/H3f3b            |
| RANK Signaling in Osteoclasts                       | 1.03E-02 | MAP2K4,MAP2K6,MAP3K9,MITF,PIK3R1       | Selenoamino Acid Metabolism                                                    | 1.49E-01 | MAT1A                       |
| Inositol Phosphate Metabolism                       | 1.06E-02 | MAP2K4,MAP2K6,MAP3K9,SGK1,PIK3R1,PLCL2 | IL-6 Signaling                                                                 | 1.53E-01 | MAP2K6,IL1RAPL1             |
| HGF Signaling                                       | 1.06E-02 | MAP2K4,MAP3K9,PIK3R1,RAP1A,ELF1        | Notch Signaling                                                                | 1.61E-01 | PSEN1                       |
| Neuropathic Pain Signaling In Dorsal Horn Neurons   | 1.22E-02 | PRKACB,GRIN2A,PIK3R1,PLCL2,GRIA4       | Methionine Metabolism                                                          | 1.61E-01 | MAT1A                       |
| CD40 Signaling                                      | 1.28E-02 | MAP2K4,MAP2K6,PIK3R1,TNFAIP3           | Cell Cycle Regulation by BTG Family Proteins                                   | 1.90E-01 | PPP2R3A                     |
| Melatonin Signaling                                 | 1.31E-02 | MAP2K4,PRKACB,MAP2K6,PLCL2             | Hepatic Cholestasis                                                            | 1.93E-01 | IL1RAPL1,SLCO1B3            |
| Insulin Receptor Signaling                          | 1.51E-02 | PRKACB,FYN,SGK1,PIK3R1,FOXO3,PPP1R11   | Role of PKR in Interferon Induction and Antiviral Response                     | 2.02E-01 | MAP2K6                      |
| Acute Myeloid Leukemia Signaling                    | 1.57E-02 | MAP2K4,MAP2K6,PIK3R1,CEBPA             | Inositol Phosphate Metabolism                                                  | 2.05E-01 | MAP2K6,CDK8                 |
| Reelin Signaling in Neurons                         | 1.67E-02 | MAP2K4,FYN,MAP3K9,PIK3R1               | Role of Macrophages, Fibroblasts and Endothelial Cells in Rheumatoid Arthritis | 2.16E-01 | MAP2K6,DAAM1,IL1RAPL1       |
| CD27 Signaling in Lymphocytes                       | 1.69E-02 | MAP2K4,MAP2K6,MAP3K9                   | PPARα/RXRα Activation                                                          | 2.31E-01 | MAP2K6,IL1RAPL1             |
| Integrin Signaling                                  | 1.70E-02 | MAP2K4,ITGAD,FYN,PIK3R1,ITGA8,RAP1A    |                                                                                |          |                             |
| Synaptic Long Term Potentiation                     | 1.76E-02 | PRKACB,GRIN2A,PPP1R11,GRIA4,RAP1A      |                                                                                |          |                             |
| Amyotrophic Lateral Sclerosis Signaling             | 1.90E-02 | GRIN2A,RAB5A,PIK3R1,GRIA4              |                                                                                |          |                             |
| HIF1α Signaling                                     | 1.95E-02 | MMP7,MMP16,PIK3R1,SLC2A2               |                                                                                |          |                             |
| Nicotinate and Nicotinamide Metabolism              | 2.10E-02 | MAP2K4,MAP2K6,MAP3K9,SGK1              |                                                                                |          |                             |

Pathways listed in this table are linked to the pathways listed in Supplemental Table 4 directly or indirectly by virtue of gene expression regulation.

Supplemental Table S4: Comparative analysis of Tat gene expression in APC

| Gene expression analysis modulated by HIV Tat in iDC                                                  |          |                                   | Gene expression analysis modulated by HIV Tat in MDM                                                  |          |                                          |
|-------------------------------------------------------------------------------------------------------|----------|-----------------------------------|-------------------------------------------------------------------------------------------------------|----------|------------------------------------------|
| Ingenuity Canonical Pathways                                                                          | p-value  | Molecules                         | Ingenuity Canonical Pathways                                                                          | p-value  | Molecules                                |
| Interferon Signaling                                                                                  | 7.59E-09 | IFIT3,OAS1,IFITM1,MX1,IFI35,STAT1 | Interferon Signaling                                                                                  | 9.94E-10 | IFIT3,OAS1,IFNGR2,IFITM1,MX1,IFI35,STAT1 |
| Pathogenesis of Multiple Sclerosis                                                                    | 4.44E-08 | CXCL10,CXCL9,CCL5,CCL3            | Pathogenesis of Multiple Sclerosis                                                                    | 1.45E-07 | CXCL10,CXCL9,CCL5,CCL3                   |
| Role of Pattern Recognition Receptors in Recognition of Bacteria and Viruses                          | 1.24E-06 | OAS1,IRF7,OAS2,CCL5,OAS3,TNF      | Role of Pattern Recognition Receptors in Recognition of Bacteria and Viruses                          | 3.95E-07 | OAS1,IRF7,OAS2,CASP1,C1QB,CCL5,OAS3      |
| Activation of IRF by Cytosolic Pattern Recognition Receptors                                          | 9.36E-09 | IRF7,STAT1,IFIT2,TNF,ISG15        | Activation of IRF by Cytosolic Pattern Recognition Receptors                                          | 3.87E-05 | IRF7,NFKBIE,STAT1,IFIT2,ISG15            |
| Role of Hypercytokinemia/hyperchemokine-<br>mia in the Pathogenesis of Influenza                      | 4.66E-05 | CXCL10,CCL5,CCL3,TNF              | Thyroid Cancer Signaling                                                                              | 1.33E-04 | CXCL10,TCF4,CCND1,TCF7L2                 |
| Differential Regulation of Cytokine Production in Macrophages and T Helper Cells by IL-17A and IL-17F | 6.55E-05 | CCL5,CCL3,TNF                     | Hepatic Fibrosis / Hepatic Stellate Cell Activation                                                   | 1.87E-04 | CXCL9,FLT1,ACTA2,IFNGR2,CCL5,STAT1       |
| Differential Regulation of Cytokine Production in Intestinal Epithelial Cells by IL-17A and IL-17F    | 1.22E-04 | CCL5,CCL3,TNF                     | Antigen Presentation Pathway                                                                          | 1.72E-03 | PSMB9,HLA-DRB4,TAP2                      |
| IL-17A Signaling in Gastric Cells                                                                     | 1.81E-04 | CXCL10,CCL5,TNF                   | Communication between Innate and Adaptive Immune Cells                                                | 2.12E-03 | CXCL10,HLA-DRB4,CCL5,CCL3                |
| Hepatic Fibrosis / Hepatic Stellate Cell Activation                                                   | 3.94E-04 | CXCL9,CSF1,CCL5,STAT1,TNF         | Role of Hypercytokinemia/hyperchemokine-<br>mia in the Pathogenesis of Influenza                      | 2.41E-03 | CXCL10,CCL5,CCL3                         |
| Communication between Innate and Adaptive Immune Cells                                                | 7.16E-04 | CXCL10,CCL5,CCL3,TNF              | TREM1 Signaling                                                                                       | 4.06E-03 | CCL7,CASP1,CCL3                          |
| TREM1 Signaling                                                                                       | 1.78E-03 | CCL7,CCL3,TNF                     | Role of IL-17A in Arthritis                                                                           | 5.04E-03 | CCL7,NFKBIE,CCL5                         |
| Role of MAPK Signaling in the Pathogenesis of Influenza                                               | 3.88E-03 | CXCL10,CCL5,TNF                   | Differential Regulation of Cytokine Production in Macrophages and T Helper Cells by IL-17A and IL-17F | 7.49E-03 | CCL5,CCL3                                |
| Glucocorticoid Receptor Signaling                                                                     | 6.18E-03 | HSPA6,CCL5,STAT1,CCL3,TNF         | Polyamine Regulation in Colon Cancer                                                                  | 7.49E-03 | TCF4,OAZ1                                |
| TNFR2 Signaling                                                                                       | 6.84E-03 | TNFAIP3,TNF                       | Differential Regulation of Cytokine Production in Intestinal Epithelial Cells by IL-17A and IL-17F    | 8.88E-03 | CCL5,CCL3                                |
| IL-9 Signaling                                                                                        | 1.06E-02 | STAT1,TNF                         | Role of JAK1, JAK2 and TYK2 in Interferon Signaling                                                   | 9.61E-03 | IFNGR2,STAT1                             |
| Atherosclerosis Signaling                                                                             | 1.20E-02 | CSF1,F3,TNF                       | IL-17A Signaling in Gastric Cells                                                                     | 1.09E-02 | CXCL10,CCL5                              |
| Renin-Angiotensin Signaling                                                                           | 1.36E-02 | CCL5,STAT1,TNF                    |                                                                                                       |          |                                          |
| Role of PKR in Interferon Induction and Antiviral Response                                            | 1.56E-02 | STAT1,TNF                         |                                                                                                       |          |                                          |
| Role of IL-17F in Allergic Inflammatory Airway Diseases                                               | 1.06E-02 | CXCL10,CCL7                       |                                                                                                       |          |                                          |

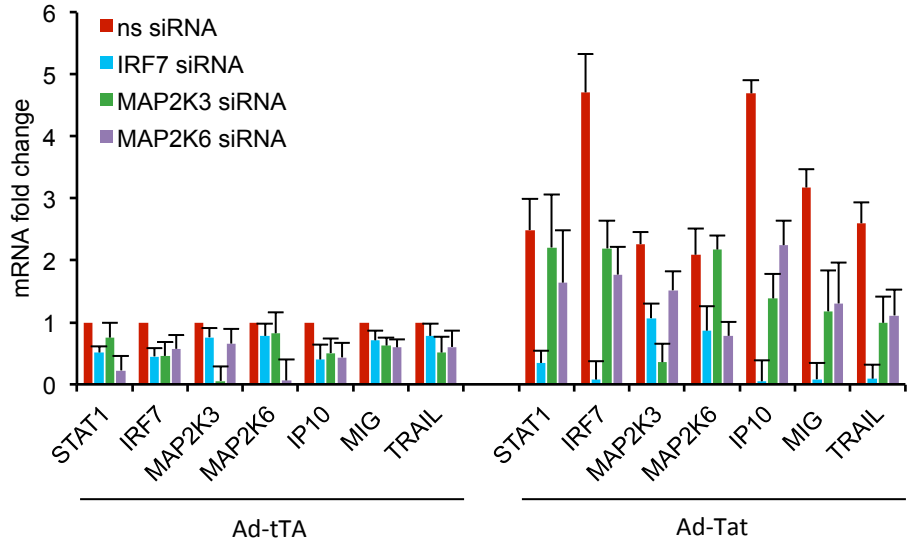

**Figure S1.** mRNA levels of cellular genes in THP-1 cells transfected for 48 hours with MAP2K6, MAP2K3, and IRF7 siRNA, infected for 24 hours with an Ad- Tat<sub>SF2</sub>/Ad-tTA or Ad-tTA alone, and analyzed by RT-qPCR. Results are normalized to actin and reported as fold induction relative to Ad-tTA infected cells treated with ns siRNA. The average of three independent experiments is shown.
